# Supplementary material
Source: PubMed Central journal article supplement (PMC3756542)
Supplement: NIHMS504714-supplement-Table_I.pdf [file NIHMS504714-supplement-Table_I.pdf]

**Table 1:** Antibodies, and cell surface antigens expressed by mECs and mBMPCs at 3 population doublings.

| Cell surface antigens | Monoclonal antibody | Source                              | mECs    | mBMPCs  |
|-----------------------|---------------------|-------------------------------------|---------|---------|
| $\alpha_1$ integrin   | Ha31/8              | BD Bioscience, San Jose, CA         | +       | +       |
| $\alpha_2$ integrin   | AF1740              | R & D Systems, Minneapolis, MN      | +       | +       |
| $\alpha_3$ integrin   | Ralph 3.2           | Santa Cruz Biotech, Santa Cruz, CA  | +       | +       |
| $\alpha_4$ integrin   | R1-2 and HP2/1      | Abcam, Cambridge, MA                | +       | ++      |
| $\alpha_5$ integrin   | 5H10-27 and MFR4.B  | Research Diagnostics, Concord, MA   | +       | ++      |
| $\alpha_6$ integrin   | GoH3                | Beckman Coulter Inc., Fullerton, CA | + (low) | + (low) |
| $\alpha_V$ integrin   | RMV7                | Research Diagnostics, Concord, MA   | +       | ++      |
| $\beta_1$ integrin    | MB1.2               | Millipore, Billerica, MA            | ++      | +++     |
| $\beta_2$ integrin    | M18/2               | eBioscience, San Diego, CA          | nd      | nd      |
| $\beta_3$ integrin    | 2C9.G3              | eBioscience, San Diego, CA          | +       | +       |
| $\beta_4$ integrin    | 346-11A             | Abcam, Cambridge, MA                | nd      | nd      |
| $\beta_5$ integrin    | KN52                | eBioscience, San Diego, CA          | nd      | nd      |
| CD34                  | RAM34               | BD Bioscience, San Jose, CA         | +       | +++     |
| Flk-1                 | Avas 12A1           | Research Diagnostics, Concord, MA   | +       | +       |
| VE-cadherin           | AF1002              | R & D Systems, Minneapolis, MN      | +++     | +       |
| CD45                  | 30-F11              | Research Diagnostics, Concord, MA   | nd      | nd      |
| CD14                  | 159010              | R & D Systems, Minneapolis, MN      | nd      | nd      |
| TLR4                  | 267518              | R & D Systems, Minneapolis, MN      | nd      | nd      |

+, low expression; ++, moderate expression; +++, high expression; nd, not detectable; mECs, mouse endothelial cells; mBMPCs, mouse Bone-Marrow Derived Progenitor Cells.
